# Supplementary material for: Mycophenolic Acid Overcomes Imatinib and Nilotinib Resistance of Chronic Myeloid Leukemia Cells by Apoptosis or a Senescent-Like Cell Cycle Arrest
Source: PubMed Central journal article supplement (PMC3504262; doi:10.1155/2012/861301), 2012-02-23

# Supplementary Figure 1

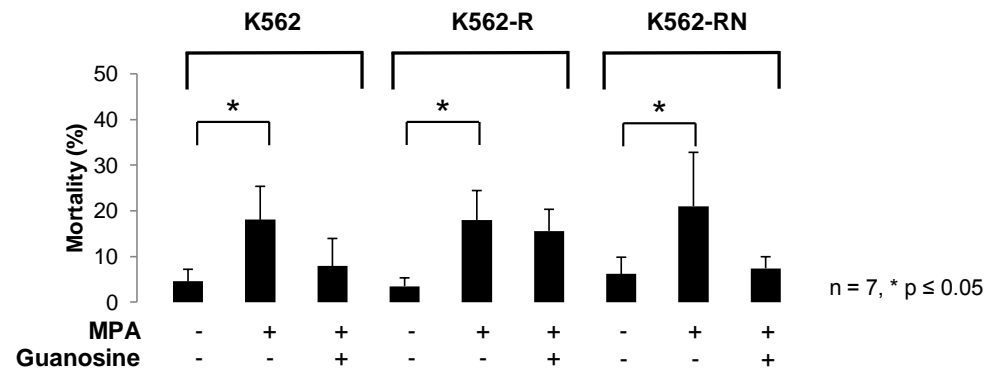

Supplementary Figure 2

K562-S cells

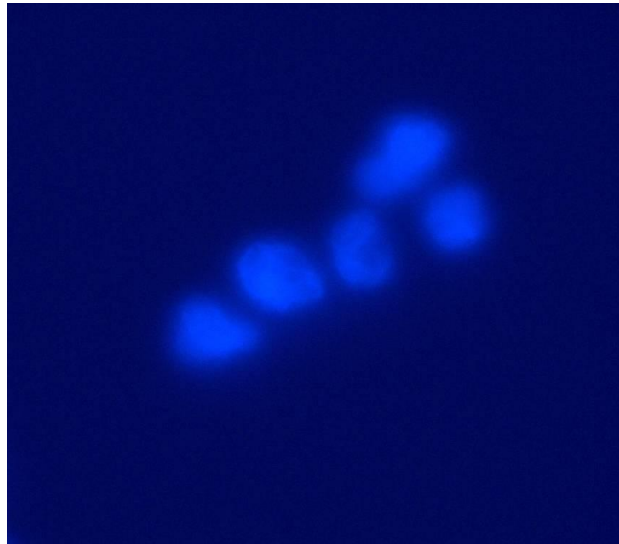

Control

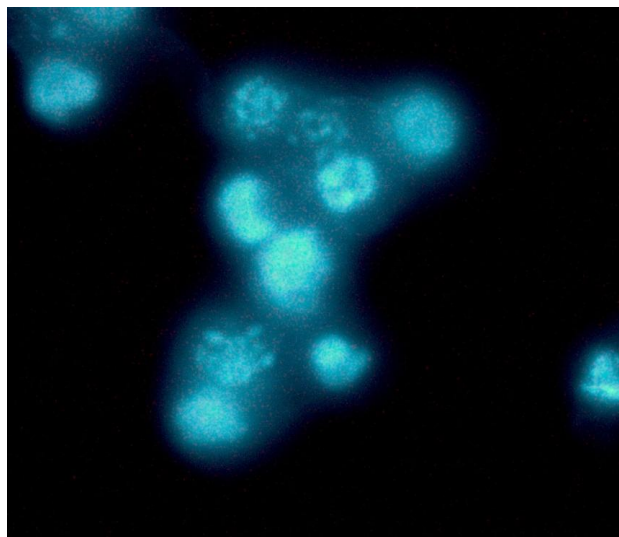

MPA  
3 µg/ml 72h

*Drullion et al.,*

Supplementary Figure 3

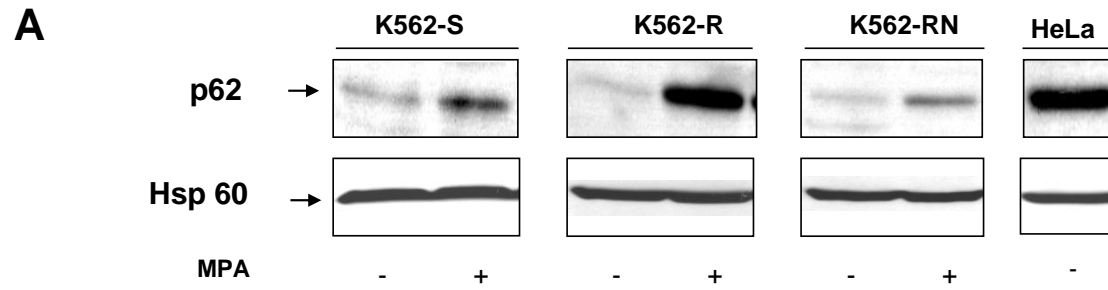

Supplementary Figure 3

**B**

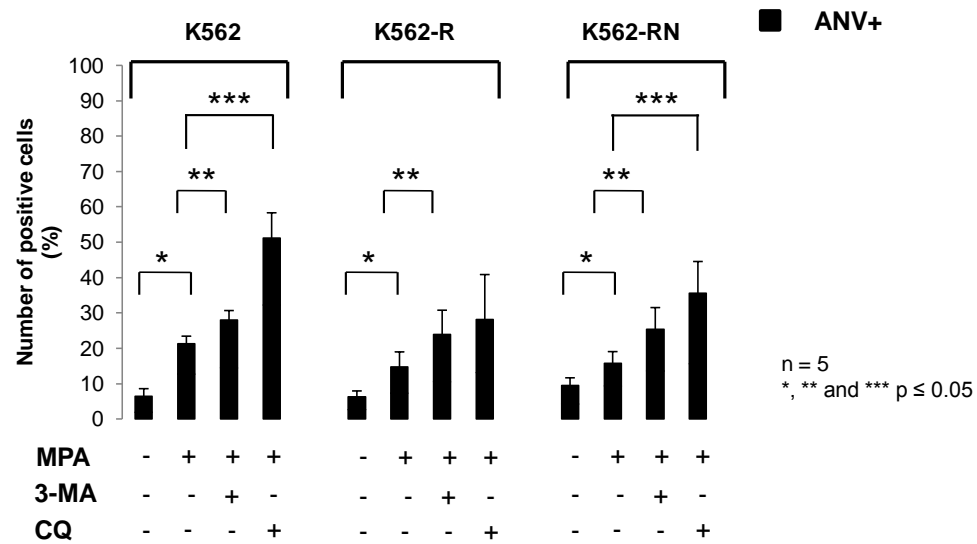

**C**

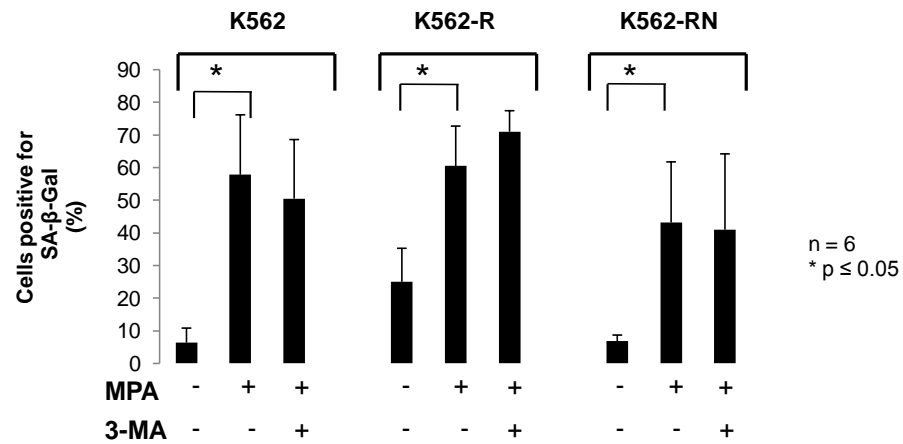

Supplementary Figure 3

**D**

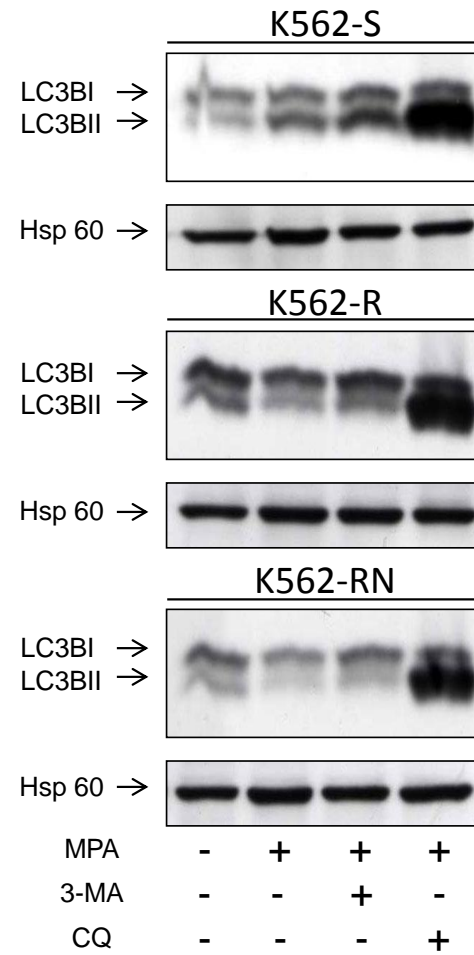

Supplementary Figure 4

CD34+ positive cells

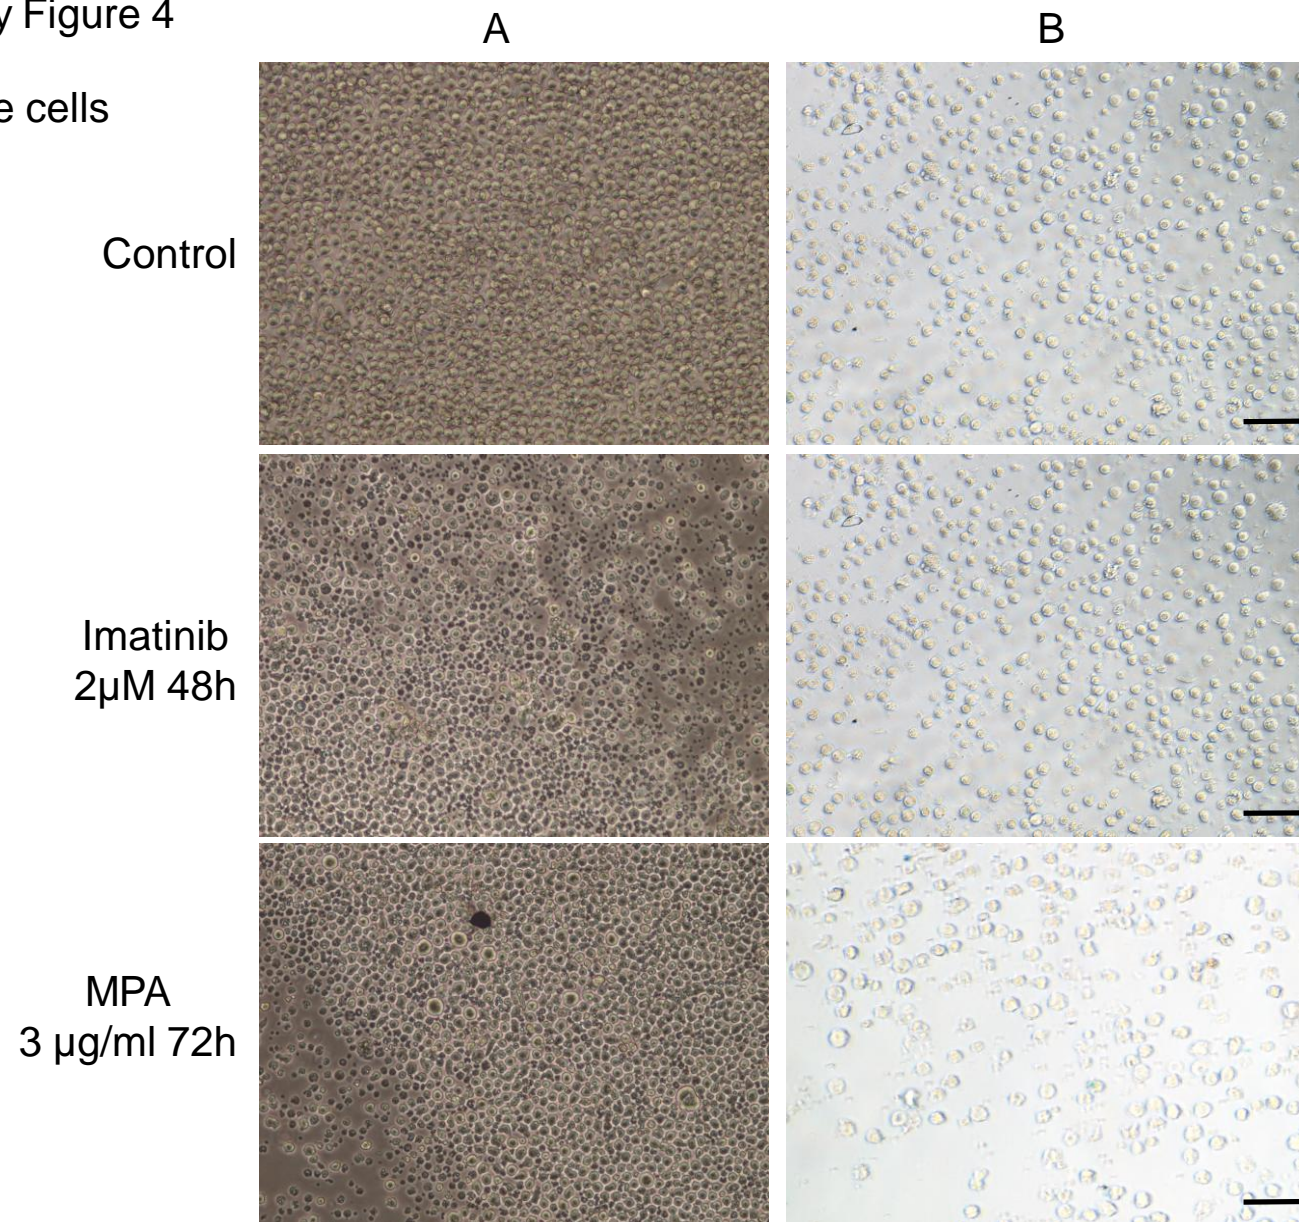

Supplementary Figure 5

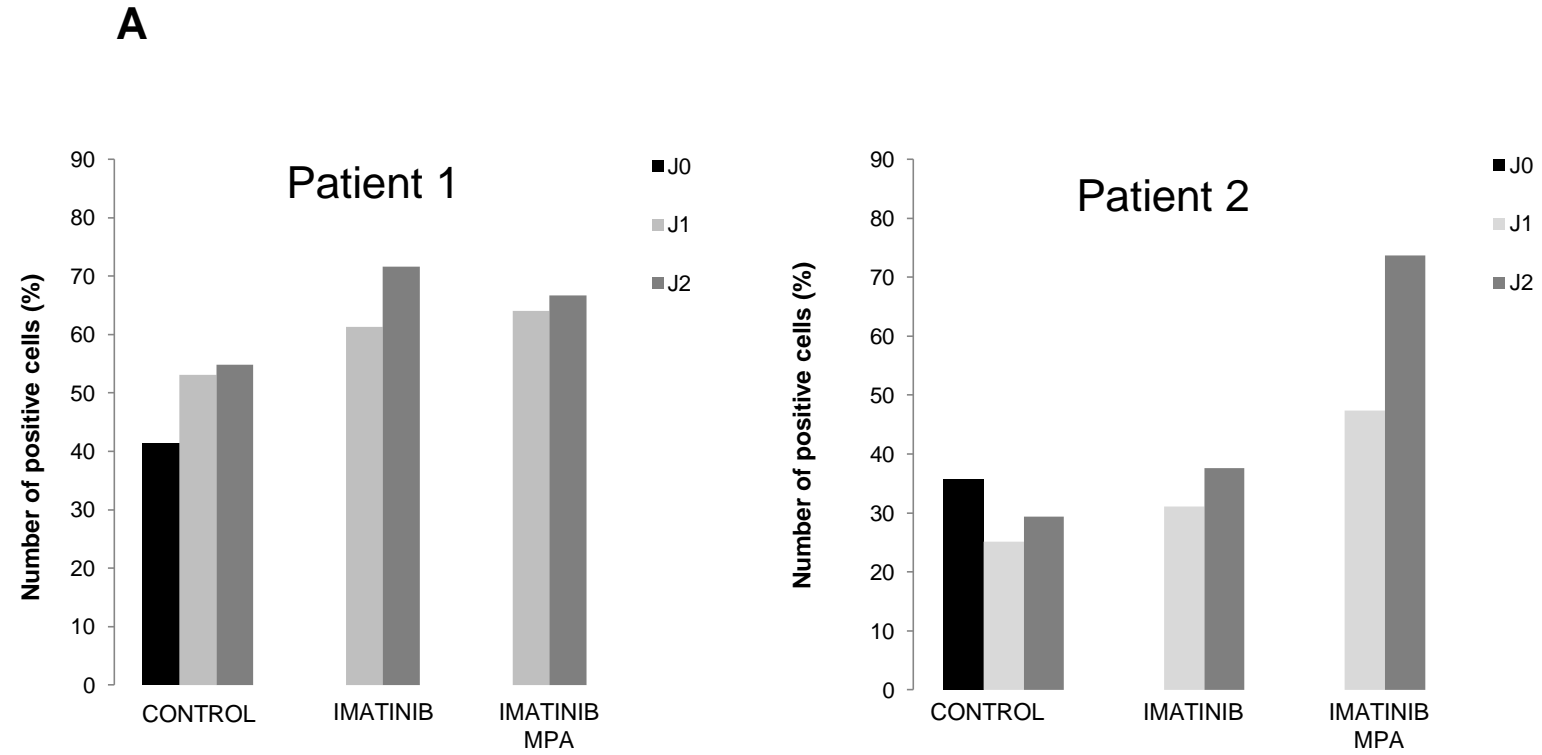

# Supplementary Figure 5

**B**

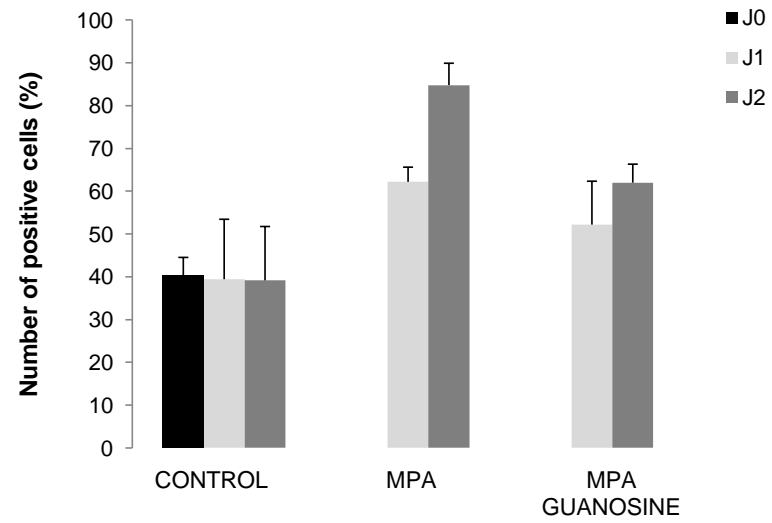



Supplementary Figure 5

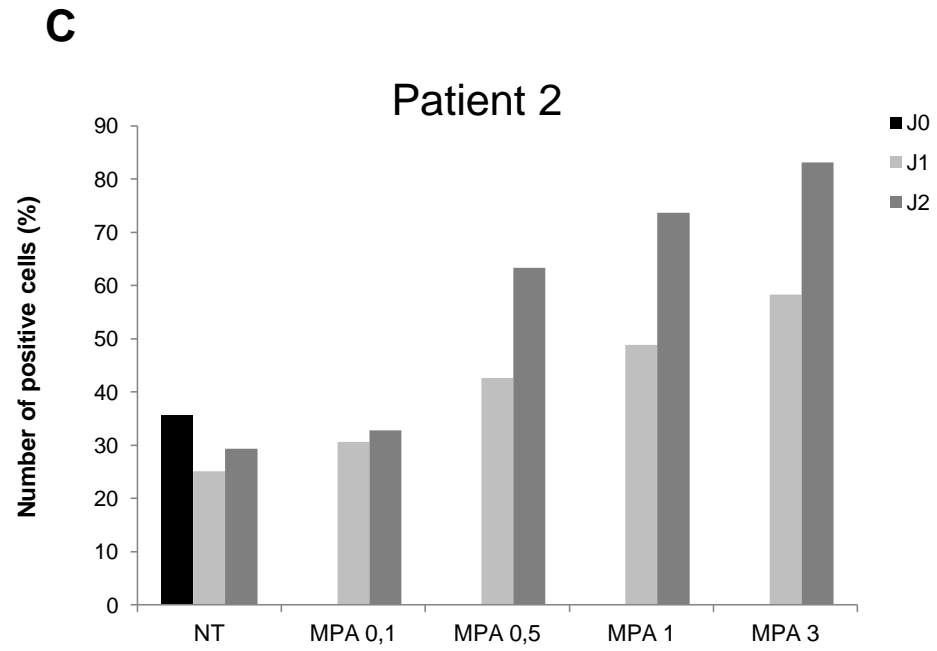

Supplement: 861301.f1.pdf [file 861301.f1.pdf]
